# Supplementary material
Source: MDPI journal article supplement (https://www.mdpi.com/2076-3417/14/3/1259)

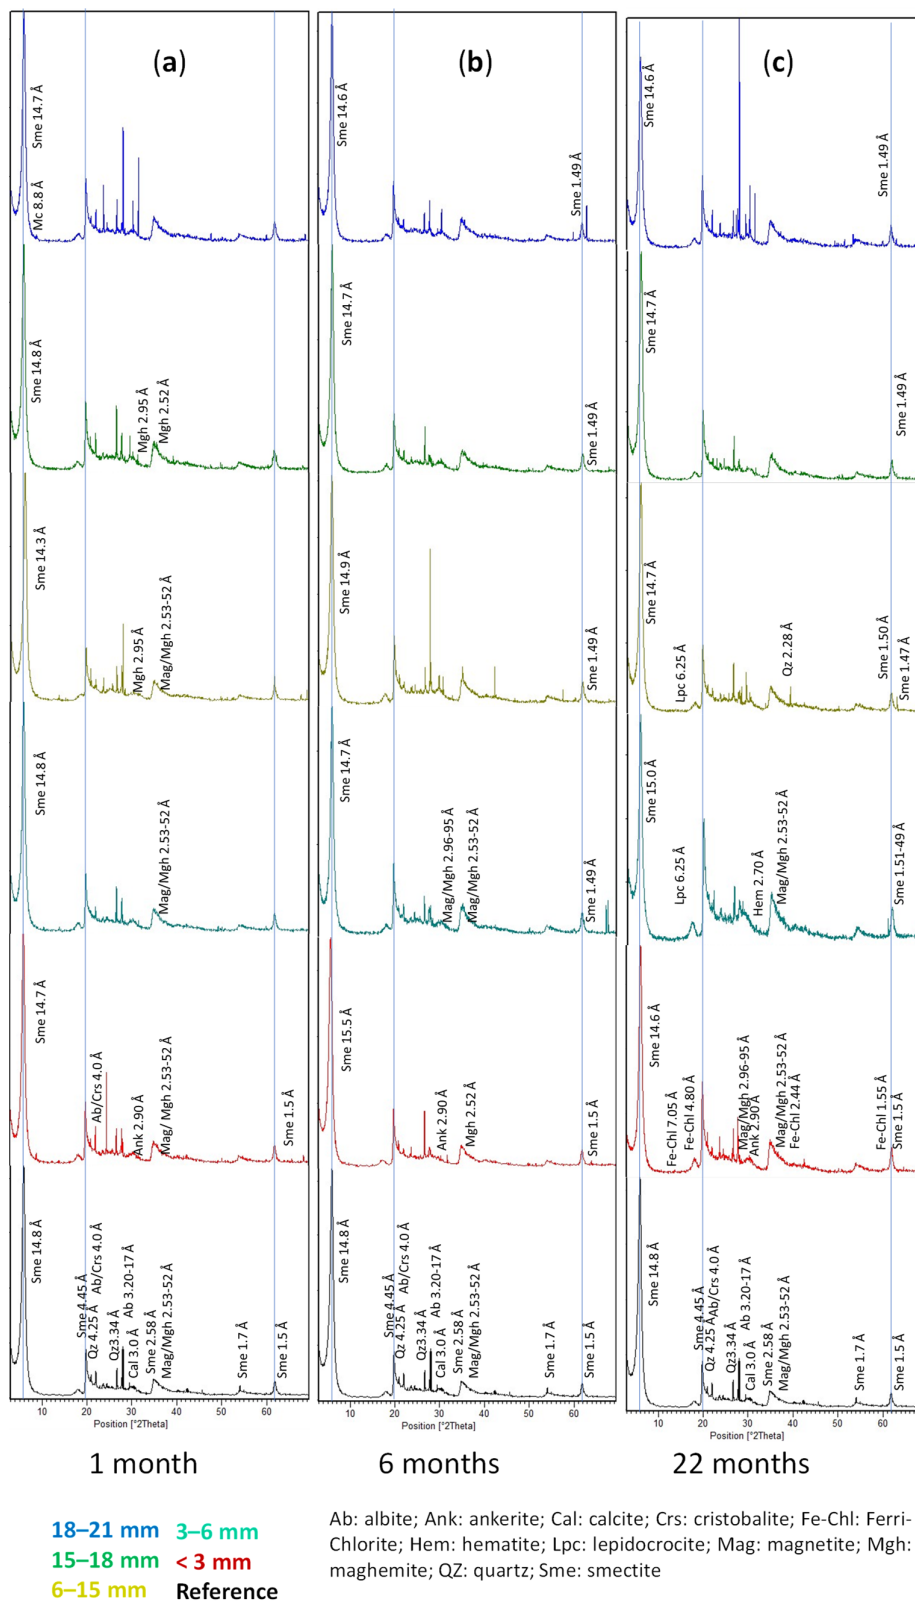

**Figure S1.** XRD of sections from the steel interface: a) 1 month; b) 6 months; c) 22 months.

Supplement: s1 [file s1]
